# Supplementary material
Source: MDPI journal article supplement (https://www.mdpi.com/2079-6412/11/8/917)
Supplement: s1 [file s1]

# Supplementary Materials Rare Biogeochemical Phenomenon Associated to Manganese Patinas on Mural Painting and Granite Ashlars

Bruno Campos <sup>1,2</sup>, Alexandra Marco <sup>1,2</sup>, David M. Freire-Lista <sup>3,4</sup>, Nuno Durães <sup>5</sup>, Joaquin Silvestre-Albero <sup>6</sup>, Eduardo Ferreira da Silva <sup>5</sup>, Eduarda Vieira <sup>1</sup>, Manuela Pintado <sup>2</sup> and Patrícia R. Moreira <sup>1,2,\*</sup>

- <sup>1</sup> CITAR Research Centre for Science and Technology of the Arts, Portuguese Catholic University, R. de Diogo Botelho, 1327, 4169-005 Porto, Portugal; bcampos@porto.ucp.pt (B.C.); alexandra.marco.ma@gmail.com (A.M.); evieira@porto.ucp.pt (E.V.)
  - <sup>2</sup> CBQF Centre for Biotechnology and Fine Chemistry, Portuguese Catholic University, R. de Diogo Botelho, 1327, 4169-005 Porto, Portugal; mpintado@porto.ucp.pt
  - <sup>3</sup> Department of Geology, UTAD Universidade de Trás-os-Montes e Alto Douro. Quinta de Prados, 5001-801 Vila Real, Portugal; davidfreire@utad.pt
  - <sup>4</sup> CGeo Centro de Geociências da Universidade de Coimbra, Universidade de Coimbra—Polo II, Rua Silvino Lima, 3030-790 Coimbra, Portugal;
  - <sup>5</sup> GEOBIOTEC Research Centre, Department of Geosciences, University of Aveiro, Campus Universitário de Santiago, 3810-193 Aveiro, Portugal; nunoduraes@ua.pt (N.D.); eafsilva@ua.pt (E.F.d.S.)
  - <sup>6</sup> Departamento de Química Inorgánica, UA Universidad de Alicante, Carretera de San Vicente del Raspeig s/n, 03690 San Vicente del Raspeig, Spain; joaquin.silvestre@ua.es
- \* Correspondence: prmoreira@ucp.pt

**Citation:** Campos, B.; Marco, A.; Freire-Lista, D.M.; Durães, N.; Silvestre-Albero, J.; da Silva, E.; Vieira, E.; Pintado, M.; Moreira, P.R. Rare Biogeochemical Phenomenon Associated to Manganese Patinas on Mural Painting and Granite Ashlars. *Coatings* **2021**, *11*, 917. <https://doi.org/10.3390/coatings11080917>

Academic Editor: Maurizio Licchelli

Received: 21 June 2021

Accepted: 27 July 2021

Published: 30 July 2021

**Publisher's Note:** MDPI stays neutral with regard to jurisdictional claims in published maps and institutional affiliations.

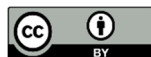

**Copyright:** © 2021 by the authors. Licensee MDPI, Basel, Switzerland. This article is an open access article distributed under the terms and conditions of the Creative Commons Attribution (CC BY) license (<http://creativecommons.org/licenses/by/4.0/>).

## Materials and Methods

### Case study

The foundation of Sta. Marinha church dates from the 12th century and the architecture is markedly influenced by a Romanesque style, made of granite ashlar (Figure S5a). The church inner walls are partially decorated with *frescoes* on the chancel and on the nave, showing two campaigns, dating from 15th and 16th centuries, being the latter attributed to the painter Arnaus. The 15th century mortar has been designated as M1 and the 16th century as M2. The north wall of the nave is covered with two pictorial campaigns composed by three registers, (i) a superior register showing a tinny fragment of a *groteschi* frame with black background; (ii) a middle register representing the Passion of Christ identified by the Christ on the Mount of Olives and the Kiss of Judas; and (iii) an inferior register showing a representation of three saints—S. Antão, S. Brás and S. Roque (Figure S5b) [1]. The black-blue patina problem is observed in the inferior register at 1.70 m from the ground, confined to an area of 0.18 m<sup>2</sup> (0.3 m × 0.6 m) (Figure S5b). The report of black-blue coloration on *frescoes* do not have a specific date since its very beginning but local citizens claim that it has been growing until the size and extent of the actual patina.

Figures

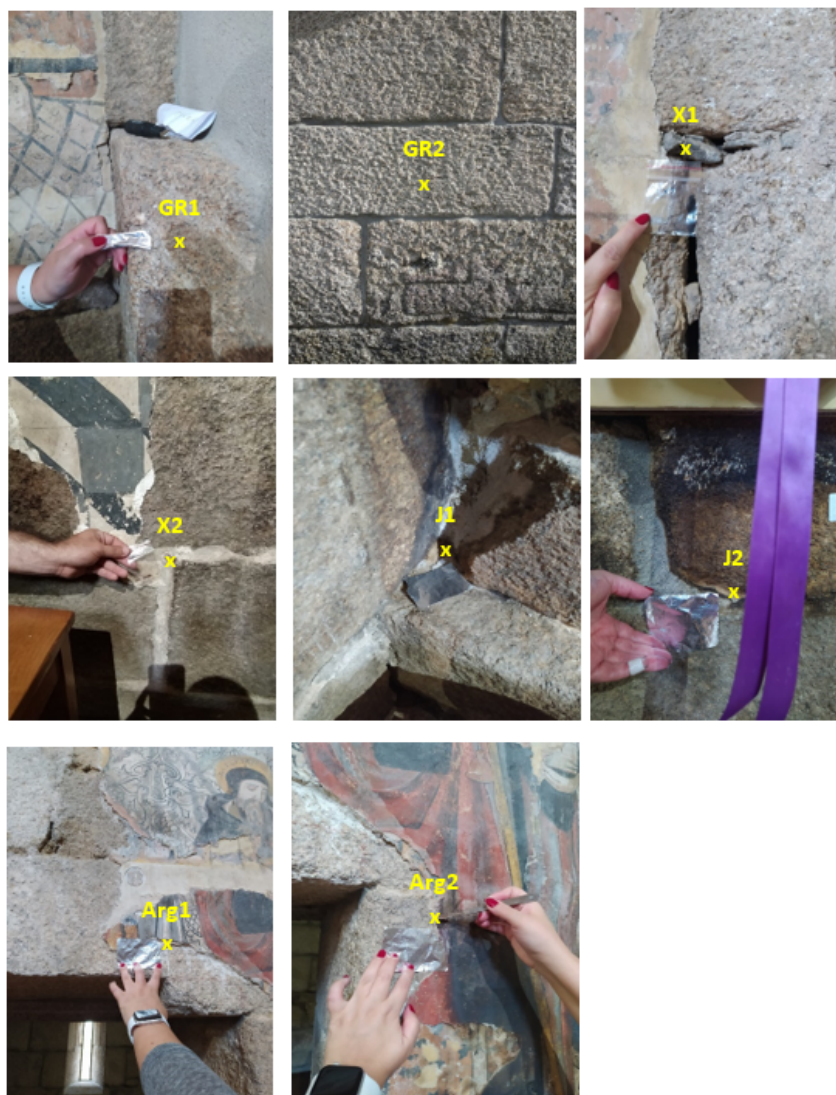

Figure S1. Sampling sites for ICP-MS analysis.

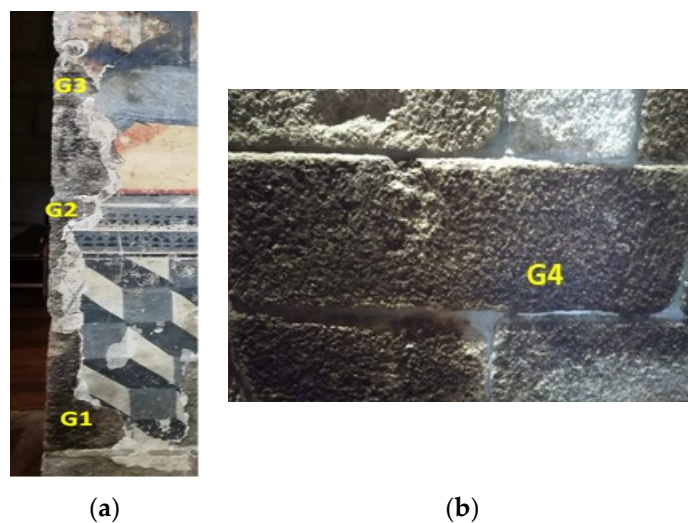

Figure S2. In situ sampling sites of granite stains from (a) front wall and (b) back wall of mural painting.

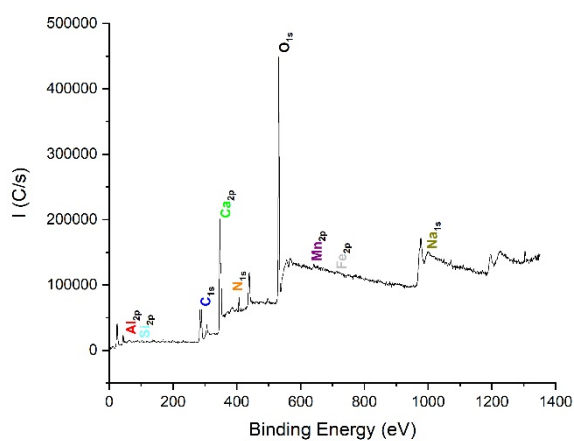

(a)

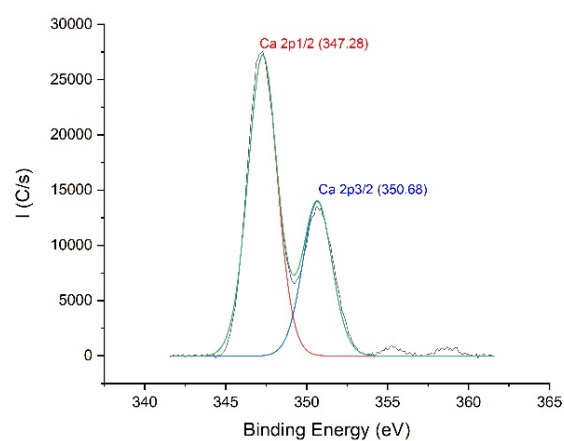

(b)

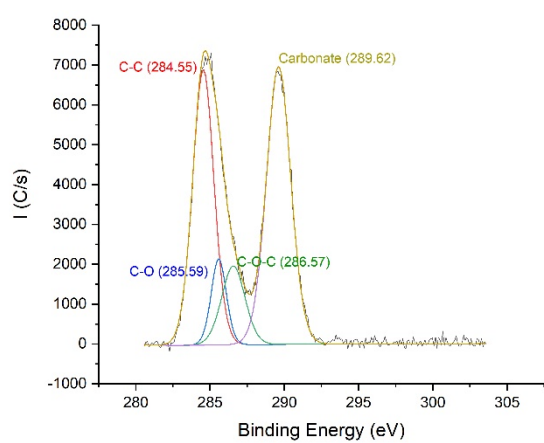

(c)

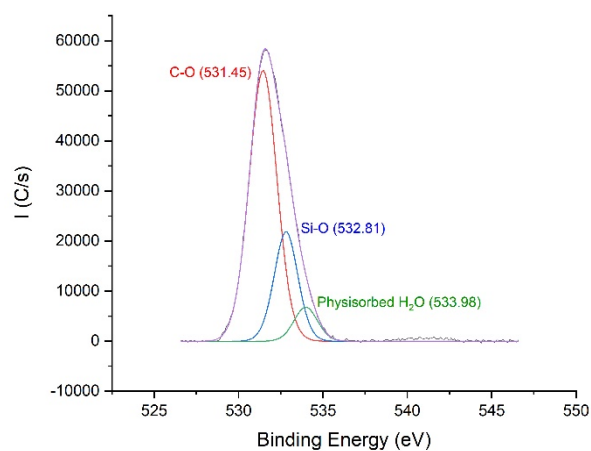

(d)

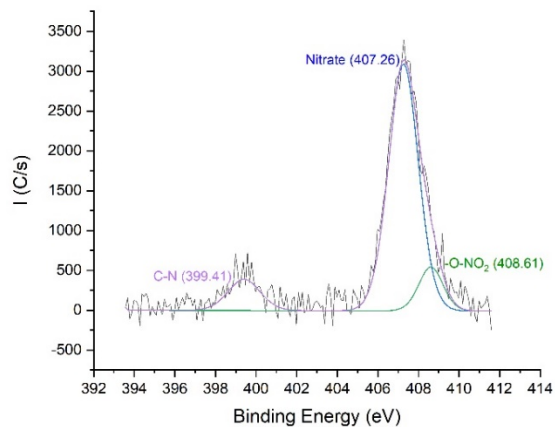

(e)

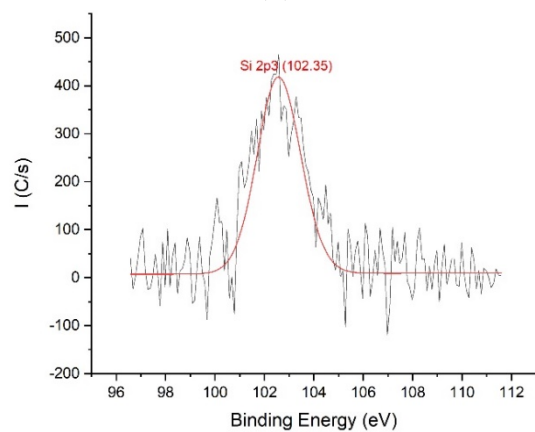

(f)

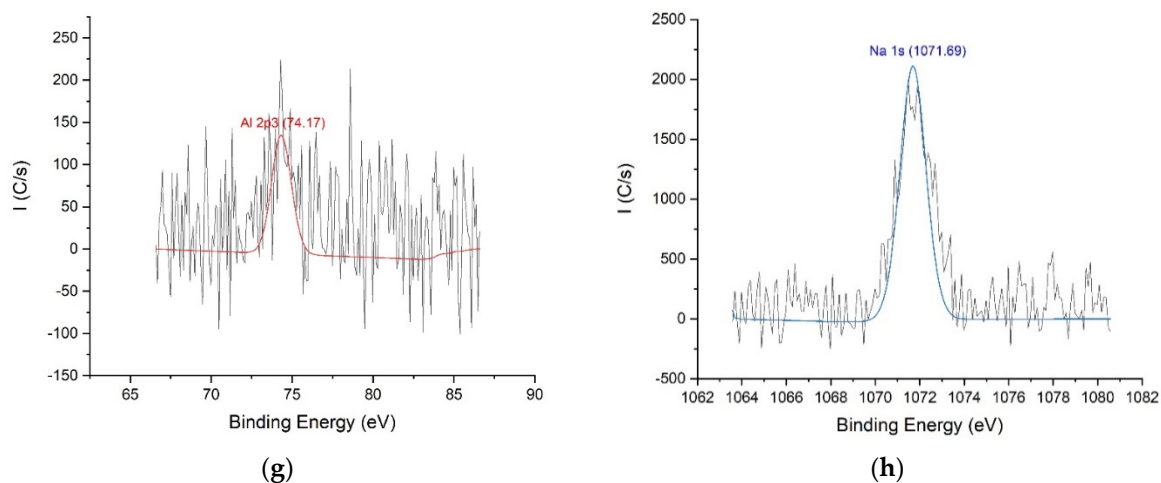

**Figure S3.** (a) XPS survey spectra of MP3; high resolution spectra of (b) Ca 2p (c) C 1s. (d) O 1s. (e) N 1s. (f) Si 2p<sub>3/2</sub>. (g) Al 2p<sub>3/2</sub> and (h) Na 1s.

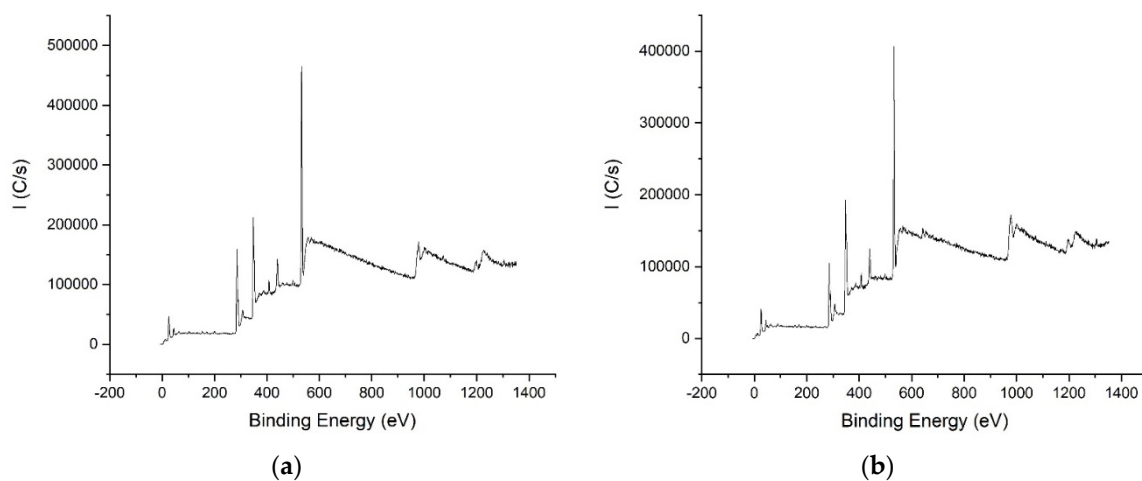

**Figure S4.** XPS survey spectra of (a) MP1 and (b) MP2.

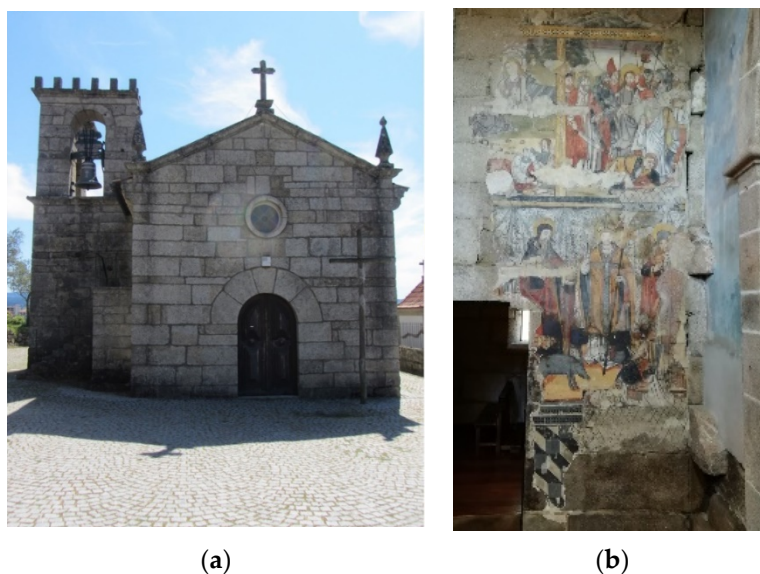

**Figure S5.** (a) Exterior façade of Sta. Marinha Church, Vila Marim, Portugal; (b) North wall decorated with mural painting.

## Tables

**Table S1.** Description of samples collected from Sta. Marinha Church and submitted to chemical analysis.

| Ref. | Description                              |
|------|------------------------------------------|
| GR1  | Granite                                  |
| GR2  | Granite                                  |
| X1   | Phyllite                                 |
| X2   | Phyllite                                 |
| J1   | Joint between granite blocks             |
| J2   | Joint between granite blocks             |
| Arg1 | Mortar                                   |
| Arg2 | Mortar                                   |
| G2   | Granite showing black-blue patina        |
| G3   | Granite showing black-blue patina        |
| MP1  | Mural painting showing black-blue patina |
| MP4  | Mural painting showing black-blue patina |
| MP6  | Mural painting showing black-blue patina |

**Table S2.** Raman assignments of pigments used in the first and second campaign.

| Color         | First Campaign                                          | Second Campaign                                                                          |
|---------------|---------------------------------------------------------|------------------------------------------------------------------------------------------|
|               | Wavenumber (cm <sup>-1</sup> )                          | Wavenumber (cm <sup>-1</sup> )                                                           |
| <b>Orange</b> | 224, 295, 355 and 410 (Fe <sub>2</sub> O <sub>3</sub> ) | 232, 289, 406, 604 and 1301 (Fe <sub>2</sub> O <sub>3</sub> ); 1054 (PbCO <sub>3</sub> ) |
| <b>Red</b>    | 253, 283 and 346 (HgS)                                  | 231, 286 and 405 (Fe <sub>2</sub> O <sub>3</sub> ); 1088 (CaCO <sub>3</sub> )            |
| <b>White</b>  | 1088 (CaCO <sub>3</sub> ); 1055 (PbCO <sub>3</sub> )    | 1088 (CaCO <sub>3</sub> ); 1051 (PbCO <sub>3</sub> )                                     |
| <b>Black</b>  | 1331 and 1613 (Carbon black)                            | 1328 and 1591 (Carbon black)                                                             |
| <b>Grey</b>   | -                                                       | 1092 (CaCO <sub>3</sub> ); 1330, 1586 and 1619 (Carbon black)                            |

**Table S3.** Iron and manganese percentage of black-blue patina on granite. G0 = raw granite (without stain); Avg = average.

| Sample | Fe (wt.%)   | Fe <sub>Gn+1</sub> /Fe <sub>G0</sub> | Mn (wt.%)   | Mn <sub>Gn+1</sub> /Mn <sub>G0</sub> | Mn/Fe       |
|--------|-------------|--------------------------------------|-------------|--------------------------------------|-------------|
| G0     | 1.01        | -                                    | 0.08        | -                                    | -           |
| G1     | 0.69        | 0.69                                 | 1.39        | 17.42                                | 2.01        |
| G2     | 0.45        | 0.45                                 | 1.98        | 24.76                                | 4.39        |
| G3     | 0.68        | 0.67                                 | 2.92        | 36.45                                | 4.30        |
| G4     | 1.08        | 1.07                                 | 2.20        | 27.46                                | 2.03        |
| Avg    | 0.73 ± 0.26 | 0.72 ± 0.26                          | 2.12 ± 0.63 | 26.52 ± 7.86                         | 3.18 ± 1.34 |



**Table S4.** Weight percentage of the elements present in black-blue patinas by pXRF (normalized values). Bal = stands for balance, it represents the light elements within the sample not excited by the analyser; only values above 0.10% are presented in this table.

| Elements | MP1   | MP2   | MP3   | MP4   | MP5   | MP6   |
|----------|-------|-------|-------|-------|-------|-------|
| Bal      | 59.39 | 66.61 | 66.08 | 61.18 | 58.81 | 58.52 |
| Pb       | -     | -     | 0.31  | 0.13  | 0.11  | -     |
| Fe       | 1.95  | 0.91  | 1.71  | 0.74  | 0.97  | 0.72  |
| Mn       | 1.92  | 1.03  | 2.01  | 1.81  | 1.86  | 1.65  |
| V        | -     | 0.12  | -     | -     | -     | -     |
| Ti       | 0.13  | 0.15  | -     | 0.13  | -     | -     |
| Ca       | 22.37 | 20.00 | 24.79 | 27.25 | 32.05 | 31.86 |
| K        | 0.91  | 1.17  | 0.59  | 0.77  | 0.45  | 0.56  |
| Al       | 2.32  | 1.46  | 0.76  | 1.23  | 1.09  | 0.90  |
| Si       | 8.19  | 7.52  | 2.79  | 5.43  | 3.02  | 3.14  |
| Cl       | 0.60  | 0.56  | 0.43  | 0.44  | 0.45  | 0.41  |
| S        | 1.97  | 0.36  | 0.26  | 0.56  | 0.96  | 1.94  |

**Table S5.** Assignments attributed to XPS peaks for MP1 and MP2 samples.

| Name         | MP1     |                                |          | MP2     |                                |          |
|--------------|---------|--------------------------------|----------|---------|--------------------------------|----------|
|              | Peak BE | Assignments                    | Atomic % | Peak BE | Assignments                    | Atomic % |
| C1s Scan A   | 284.55  | Adventitious carbon            | 21.45    | 284.62  | Adventitious carbon            | 17.05    |
| C1s Scan B   | 285.89  | C–O                            | 10.83    | 286.14  | C–O–C                          | 7.2      |
| C1s Scan C   | 288.08  | O–C=O                          | 3.63     | 288.21  | O–C=O                          | 3.85     |
| C1s Scan D   | 289.69  | Carbonate                      | 8.00     | 289.83  | Carbonate                      | 8.64     |
| N1s Scan A   | 400.09  | C–N                            | 0.22     | 399.82  | C–N                            | 0.37     |
| N1s Scan B   | 407.32  | Nitrate                        | 1.53     | 407.24  | Nitrate                        | 2.05     |
| N1s Scan C   | 408.73  | –O–NO <sub>2</sub>             | 1.01     | 408.62  | –O–NO <sub>2</sub>             | 0.43     |
| O1s Scan A   | 531.32  | C–O                            | 16.5     | 531.43  | C–O                            | 23.76    |
| O1s Scan B   | 532.56  | Si–O                           | 18.98    | 532.84  | Si–O                           | 15.72    |
| O1s Scan C   | 534.04  | Physisorbed H <sub>2</sub> O   | 4.82     | 534.43  | Physisorbed H <sub>2</sub> O   | 6.77     |
| Al2p3 Scan A | 73.87   | Al <sub>2</sub> O <sub>3</sub> | 0.25     | -       | -                              | -        |
| Si2p3 Scan A | 102.41  | SiO <sub>2</sub>               | 0.93     | 102.73  | SiO <sub>2</sub>               | 0.67     |
| Ca2p3 Scan A | 347.35  | CaCO <sub>3</sub>              | 11.19    | 347.35  | CaCO <sub>3</sub>              | 12.24    |
| Mn2p3 Scan A | 641.39  | Mn <sub>3</sub> O <sub>4</sub> | 0.1      | 642.08  | Mn <sub>3</sub> O <sub>4</sub> | 0.43     |
| Mn2p3 Scan B | 643.32  | MnO <sub>2</sub>               | 0.06     | 644.56  | MnO <sub>2</sub>               | 0.21     |
| Fe2p3 Scan A | 710.43  | Fe <sub>3</sub> O <sub>4</sub> | 0.05     | 710.92  | Fe <sub>3</sub> O <sub>4</sub> | 0.12     |
| Fe2p3 Scan B | 712.9   | Fe <sub>2</sub> O <sub>3</sub> | 0.03     | 713.58  | Fe <sub>2</sub> O <sub>3</sub> | 0.08     |
| Na1s Scan A  | 1071.86 | NaCl                           | 0.39     | 1071.81 | NaCl                           | 0.4      |

**Table S6.** Concentrations of major and trace elements in groundwater of Vila Marim.

| Element | Unit               | Groundwater |
|---------|--------------------|-------------|
| Ca      | mg·L <sup>-1</sup> | 7.72        |
| K       |                    | 12.3        |
| Mg      |                    | 3.11        |
| Na      |                    | 11.0        |
| Al      |                    | 6.56        |
| As      |                    | 9.48        |
| Ba      |                    | 45.4        |
| Co      |                    | <dl         |
| Cr      |                    | 0.13        |
| Cu      |                    | 0.91        |
| Fe      | µg·L <sup>-1</sup> | 1.78        |
| Mn      |                    | 2.12        |
| Ni      |                    | 0.48        |
| P       |                    | 566         |
| Pb      |                    | <dl         |
| Sr      |                    | 45.2        |
| U       |                    | 0.17        |
| Zn      |                    | 3.61        |

dl—detection limit.

**Table S7.** Concentrations of major and trace elements of granite and *frescoes* affected by black-blue patina.

| Element | Unit                | G2     | G3     | MP1     | MP4     | MP6     |
|---------|---------------------|--------|--------|---------|---------|---------|
| Al      | mg·kg <sup>-1</sup> | 12364  | 45487  | 10987   | 13970   | 4568    |
| As      |                     | 8.59   | 6.42   | 9.913   | 11.009  | 15.196  |
| Ba      |                     | 163    | 110    | 348     | 369     | 257     |
| Ca      |                     | 4886   | 8851   | 235,050 | 278,570 | 329,349 |
| K       |                     | 6753   | 30,912 | 5264    | 6092    | 4152    |
| Co      |                     | 86.79  | 48.84  | 13.46   | 12.25   | 16.12   |
| Cr      |                     | 16.66  | 24.24  | 14.84   | 20.07   | 17.49   |
| Cu      |                     | 10.13  | 16.29  | 44.90   | 247.58  | 237.34  |
| Fe      |                     | 15,937 | 68,504 | 9790    | 11,850  | 4946    |
| Mg      |                     | 3134   | 11,496 | 4398    | 3929    | 3177    |
| Mn      |                     | 5810   | 5639   | 4760    | 9207    | 23672   |
| Na      |                     | 457    | 869    | 3916    | 3743    | 2828    |
| Ni      |                     | 15.71  | 17.18  | 65.71   | 30.54   | 13.92   |
| P       |                     | 637    | 1364   | 541     | 1100    | 363     |
| Pb      |                     | 25.9   | 42.2   | 143.7   | 522.0   | 11336.2 |
| Sr      |                     | 27.7   | 33.0   | 713.3   | 710.6   | 519.2   |
| U       |                     | 4.51   | 8.14   | 2.84    | 3.41    | 4.56    |
| Zn      |                     | 247.83 | 521.05 | 85.15   | 192.95  | 116.96  |

Table S8. Similar Mn patinas found on built heritage and caves.

| Mn Coatings                                     | Place of Coating           | Type of Stone/Rock   | Thickness of Coating | Maximum Mn Concentration (Technique) | Mn Source                            | Suggested Coating Formation                                                      |
|-------------------------------------------------|----------------------------|----------------------|----------------------|--------------------------------------|--------------------------------------|----------------------------------------------------------------------------------|
| <b>Freiburger Münster—Germany [2]</b>           | External wall              | Sandstone            | *N.F.                | 7.71 wt.% (fs LA-ICP-MS)             | Atmospheric dust                     | Leaching and redeposition of aerosol Mn followed by autocatalytic oxidation      |
| <b>Smithsonian Institution Building—USA [3]</b> | External wall              | Red Seneca Sandstone | 200–300 µm           | 2.71 wt.% (X-ray microanalysis)      | Atmospheric dust                     | Leaching and redeposition of aerosol Mn followed by autocatalytic oxidation      |
| <b>Neang Khmau temple—Cambodia [4]</b>          | External and Internal wall | Laterite             | 300–1000 µm          | 48 at.% (EDX)                        | Lateritic rock                       | Efflorescence and precipitation of Mn favoured by Mn-oxidizing microbes          |
| <b>Lascaux Cave—France [5]</b>                  | Wall and ceiling           | Sandstone            | *N.F.                | *N.F.                                | Sandstone (clayey sediment)          | Biogenic oxidation of Mn (by <i>A. nepalense</i> , a Mn oxide-depositing fungus) |
| <b>Paranhos tunnel Portugal [6]</b>             | Wall and ceiling           | Granite              | 1–100 mm             | 1.19 wt.% (ICP-MS)                   | Mn leached from soil and rocks       | Biogenic oxidation of Mn                                                         |
| <b>Pautler Cave—USA [7]</b>                     | Wall, ceiling and floor    | Limestone            | *N.F.                | 45.4 wt.% (ICP-OES)                  | Mn-rich groundwater and stream water | Secondary abiotic reactions between Mn(II) and biogenic Mn(IV)                   |

\*N.F.—Not Found.

## Reference

- de Ferri, G.; Mazzini, L.; Vallotto, F.; Pojana, D. In situ non-invasive characterization of pigments and alteration products on the masonry altar of S. Maria ad Undas (Idro, Italy). *Archaeol. Anthropol. Sci.* **2019**, *11*, 609–625.
- Macholdt, D.S.; Herrmann, S.; Jochum, K.P.; Kilcoyne, A.D.; Laubscher, T.; Pfisterer, J.H.; Pöhlker, C.; Schwager, B.; Weber, B.; Weigand, M.; et al. Black manganese-rich crusts on a Gothic cathedral. *Atmos. Environ.* **2017**, *171*, 205–220, doi: 10.1016/j.atmosenv.2017.10.022.
- Vicenzi, Z.; Grissom, E.; Livingston, C.; Weldon-Yochim, R.; Rock varnish on architectural stone: microscopy and analysis of nanoscale manganese oxide deposits on the Smithsonian Castle, Washington, DC. *Herit. Sci.* **2016**, *4*, 26, doi: 10.1186/s40494-016-0093-2.
- Dakal, T.; Cameotra, S. Microbially induced deterioration of architectural heritages: routes and mechanisms involved. *Environ. Sci. Eur.* **2012**, *24*, 36, doi: 10.1186/2190-4715-24-36.
- Saiz-Jimenez, C.M.; Miller, A.; Martin-Sanchez, P.; Hernandez-Marine, P. Uncovering the origin of the black stains in Lascaux Cave in France. *Environ. Microbiol.* **2012**, *14*, 3220–3231, doi: 10.1111/1462-2920.12008.
- Miller, A.Z.; Dionísio, A.; Braga, M.S.; Hernández-Marín, M.; Afonso, M.J.; Muralha, V.S.F.; Herrera, L.K.; Raabe, J.; Fernandez-Cortes, A.; Cuezva, S.; Hermosin, B.; et al. Biogenic Mn oxide minerals coating in a subsurface granite environment. *Chem. Geol.* **2012**, *322–323*, 181–191, doi: 10.1016/j.chemgeo.2012.07.005.
- Friedrich, A.J.; Hasenmueller, E.A.; Catalano, J.G. Composition and structure of nanocrystalline Fe and Mn oxide cave deposits: Implications for trace element mobility in karst systems, *Chem. Geol.* **2011**, *284*, 82–96, doi: 10.1016/j.chemgeo.2011.02.009.
